# Supplementary material for: A novel fuzzy programming approach for piece selection problem in P2P content distribution network
Source: PeerJ Comput Sci. 2024 Jan 3;10:e1645. doi: 10.7717/peerj-cs.1645 (PMC10773565; doi:10.7717/peerj-cs.1645)
Supplement: Supplemental Information 1 [file peerj-cs-10-1645-s001.xlsx]

## Sheet: Traffic Redudancy
No of Peers	PPS	LRF	RPS	BPS	FPS
100	12	14	16	18	10
200	15	16	18	20	12
300	18	18	20	22	15
400	20	22	24	25	18
500	22	24	26	28	20
600	24	26	28	30	22

## Sheet: Download Time
No of Peers	PPS	LRF	RPS	BPS	FPS
100	150	175	200	220	120
200	210	225	250	275	150
300	250	275	310	335	200
400	300	325	350	375	250
500	340	365	380	410	300
600	410	435	460	495	375
														b

## Sheet: Download Cost
No of Peers	PPS	LRF	RPS	BPS	FPS
100	40	45	50	55	35
200	45	50	55	60	40
300	50	55	60	64	45
400	55	60	64	70	50
500	60	64	70	74	55
600	64	70	74	80	60

## Sheet: Link Failure
No of Peers	FPS	LRF	RPS	BPS	PPS
100	12	14	20	16	10
200	15	20	24	18	15
300	24	26	26	22	28
400	28	32	28	25	32
500	32	38	35	28	40
600	40	42	44	32	52

## Sheet: Link Stress
No of Peers	PPS	LRF	RPS	BPS	FPS
100	1.2	1.4	2	1.6	1
200	1.5	2	2.4	1.8	1.5
300	2.4	2.6	2.6	2.2	2.8
400	2.8	3.2	2.8	2.5	3.2
500	3.2	3.8	3.5	2.8	4
600	4	4.2	4.4	3.2	5.2
